# Supplementary material for: Phytic acid assisted ultra-fastin situconstruction of Ni foam-supported amorphous Ni–Fe phytates to enhance catalytic performance for the oxygen evolution reaction
Source: Royal Society of Chemistry journal article supplement (doi:10.1039/d2qi00924b), 2022-01-01
Supplement: d2qi00924b1.pdf [file d2qi00924b1.pdf]

## Supporting information

### **Phytic acid assisted ultra-fast in-situ constructing Ni foam-supported amorphous Ni-Fe phytates to enhance catalytic performance for oxygen evolution reaction**

Taotao Gao,<sup>a,\*</sup> Shuaiwei Wu,<sup>b</sup> Xiaoqin Li,<sup>a</sup> Chaohong Lin,<sup>c</sup> Qu Yue,<sup>d</sup> Xiangmin Tang,<sup>b</sup>

Shumin Yu,<sup>b</sup> and Dan Xiao<sup>a, d,\*</sup>

<sup>a</sup> Institute for Advanced Study, Chengdu University, Chengdu 610106, P. R. China.

<sup>b</sup> School of Mechanical Engineering, Chengdu University, Chengdu 610106, P. R. China.

<sup>c</sup> Southwest Institute of Chemical Co., Ltd., Chengdu 610225, P. R. China.

<sup>d</sup> College of Chemistry, Sichuan University, Chengdu 610064, P. R. China.

\* Corresponding author: Taotao Gao and Dan Xiao

Tel number: +86-28-85415029

Fax number: +86-28-85416029

E-mail address: gaott1011@outlook.com (Taotao Gao) and xiaodan@scu.edu.cn (Dan Xiao)

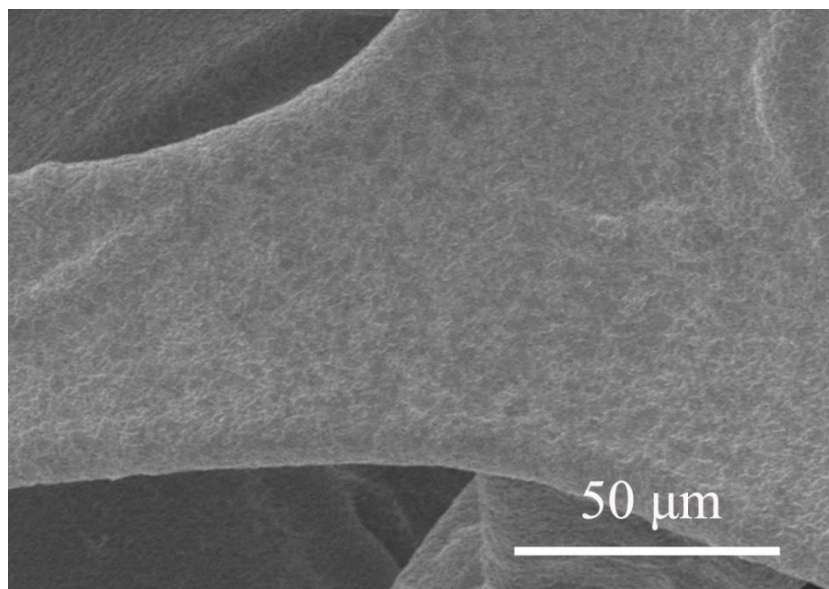

**Fig. S1** SEM image of the Ni-Fe-phy@NF.

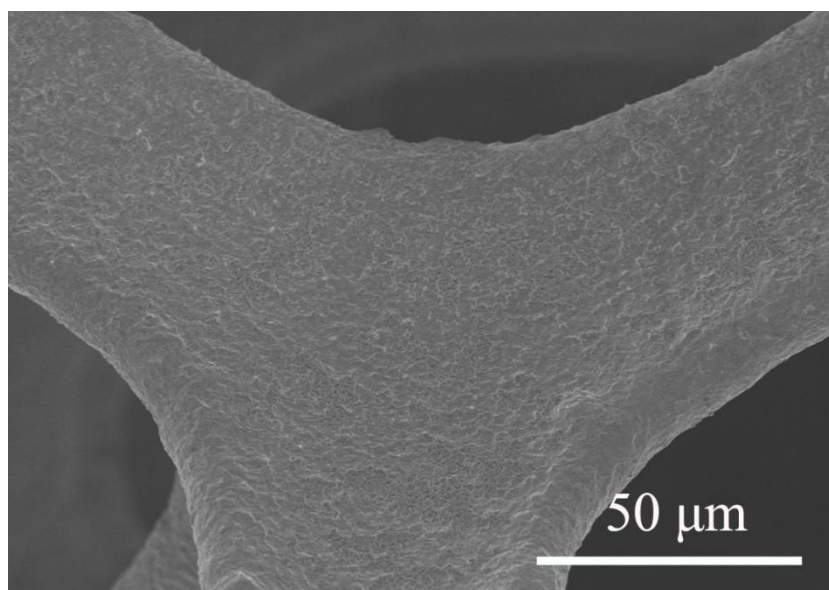

**Fig. S2** SEM image of the Ni-Fe-pho@NF.

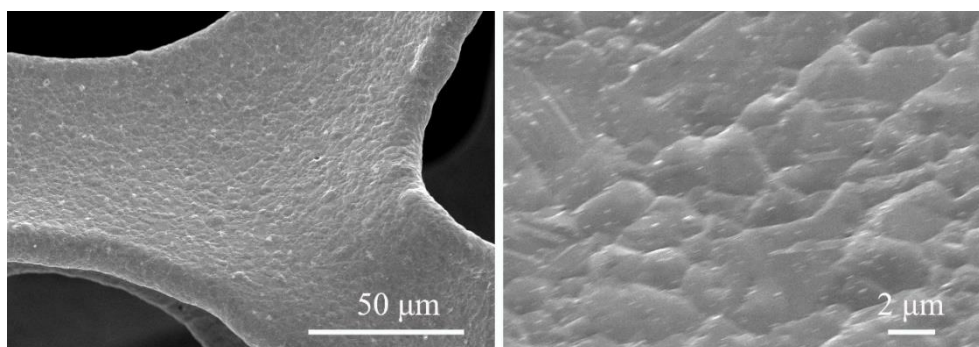

**Fig. S3** SEM images of the Ni-phy@NF.

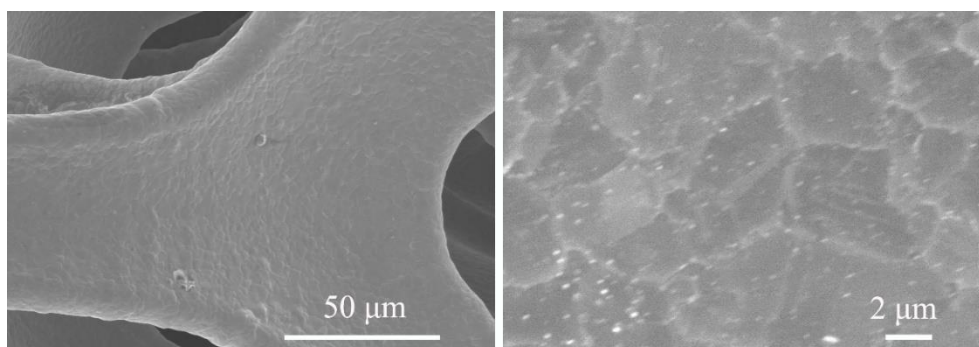

**Fig. S4** SEM images of the Ni-pho@NF.

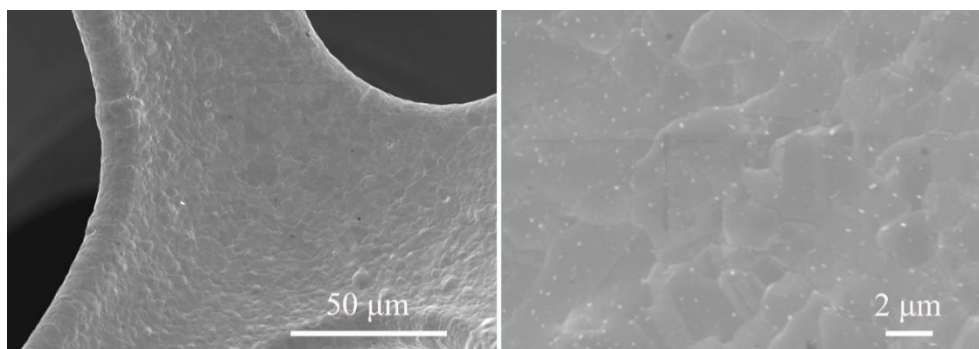

**Fig. S5** SEM images of the NF.

**Table S1.** Hydrogen ion concentrations in the etching solutions.

| Etching solution                                    | Phytic acid (0.6 mol L <sup>-1</sup> ) | Phytic acid (0.6 mol L <sup>-1</sup> )        | Phosphoric acid (0.6 mol L <sup>-1</sup> ) | Phosphoric acid (0.6 mol L <sup>-1</sup> )    |
|-----------------------------------------------------|----------------------------------------|-----------------------------------------------|--------------------------------------------|-----------------------------------------------|
|                                                     |                                        | containing Fe (3+) (0.5 mol L <sup>-1</sup> ) |                                            | containing Fe (3+) (0.5 mol L <sup>-1</sup> ) |
| H <sup>+</sup> concentration (mol L <sup>-1</sup> ) | 1.04                                   | 2.88                                          | 0.09                                       | 1.10                                          |

**Table S2.** Element content of Fe and P in Ni-Fe-phy@NF and Ni-Fe-pho@NF according to the ICP-OMS test.

| Catalytic electrode | Ni-Fe-phy@NF | Ni-Fe-pho@NF |
|---------------------|--------------|--------------|
| Fe (wt%)            | 0.16%        | 0.13%        |
| P (wt%)             | 0.54%        | 0.09%        |

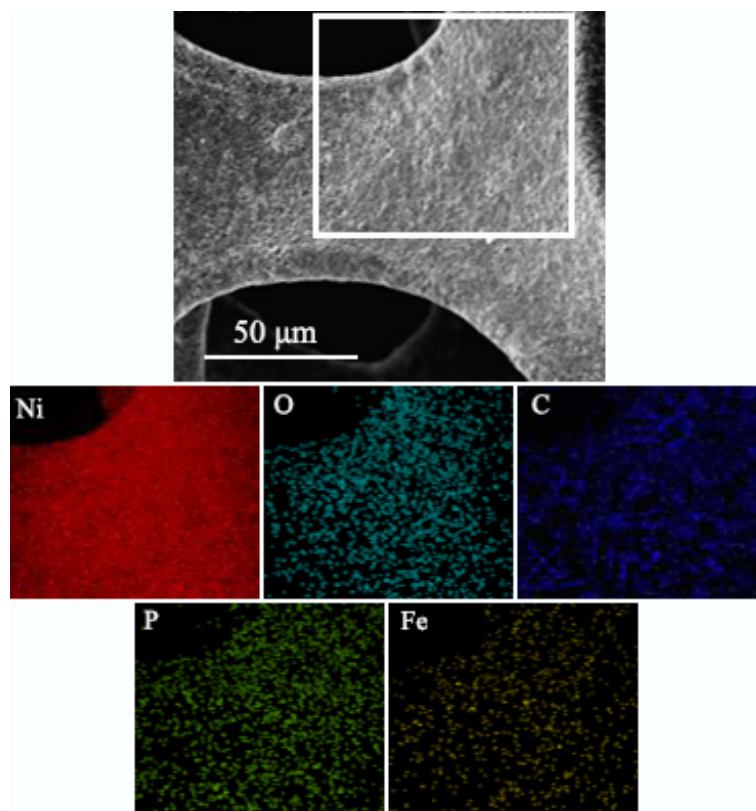

**Fig. S6** SEM image of Ni-Fe-phy@NF and the element mapping of Ni, O, C, P and Fe, respectively.

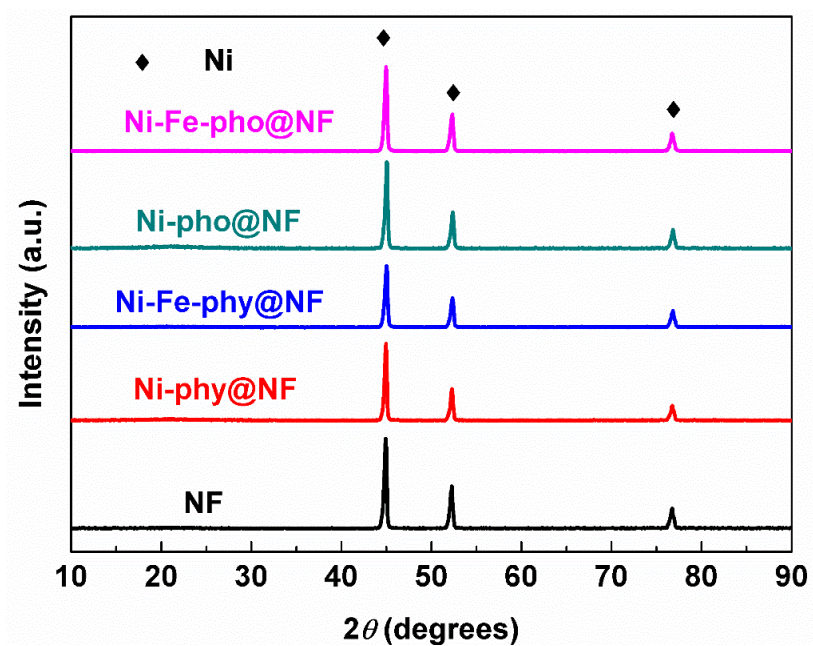

Fig. S7 XRD patterns of the prepared catalytic electrodes.

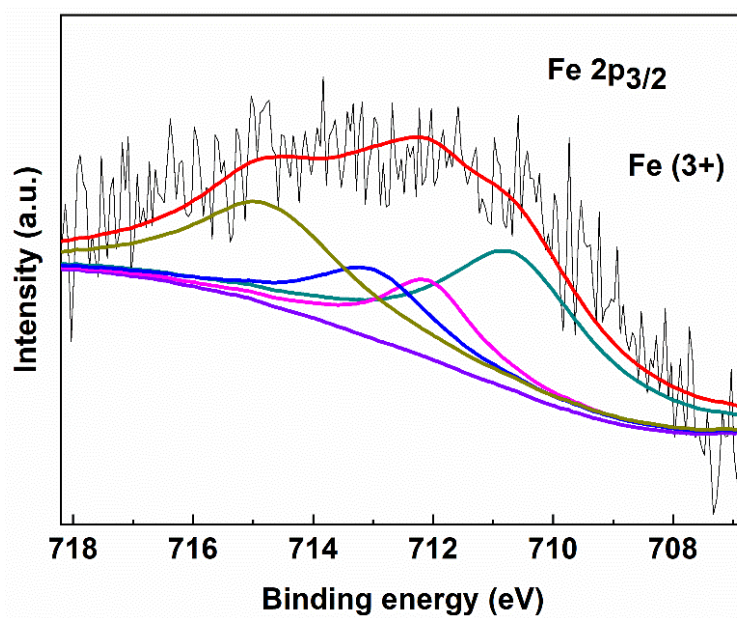

Fig. S8 Fe 2p<sub>3/2</sub> XPS spectrum of the Ni-Fe-phy@NF.

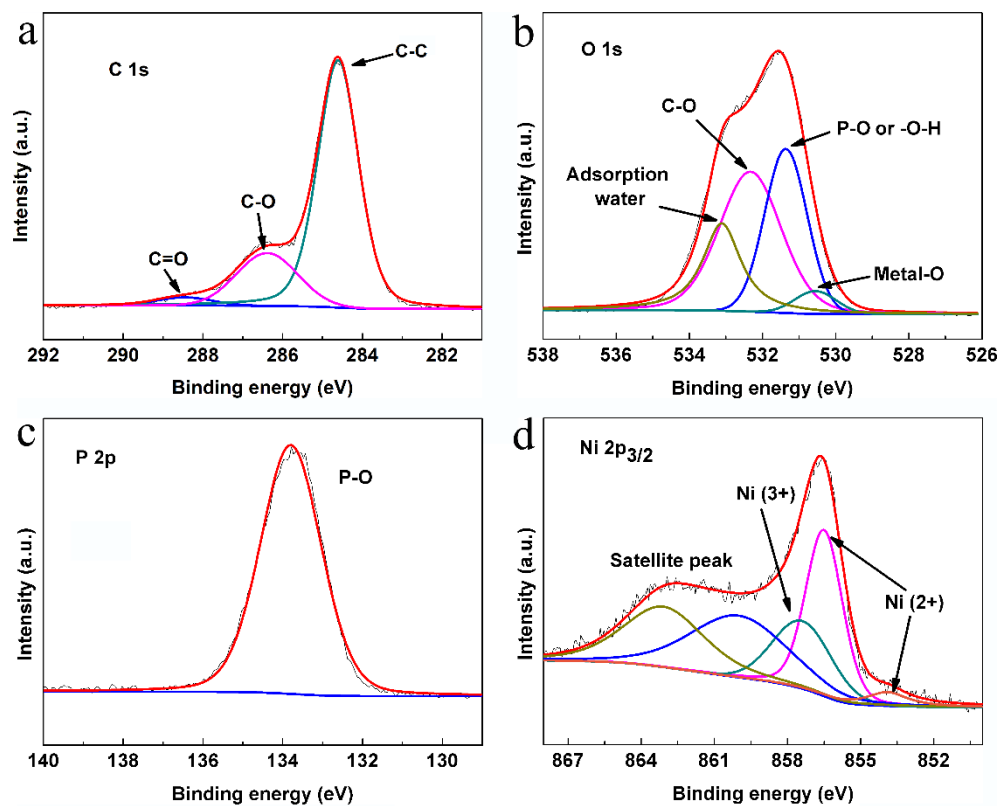

**Fig. S9** a) C 1s, b) O 1s, c) P 2p and d) Ni 2p<sub>3/2</sub> XPS spectra of the Ni-phy@NF.

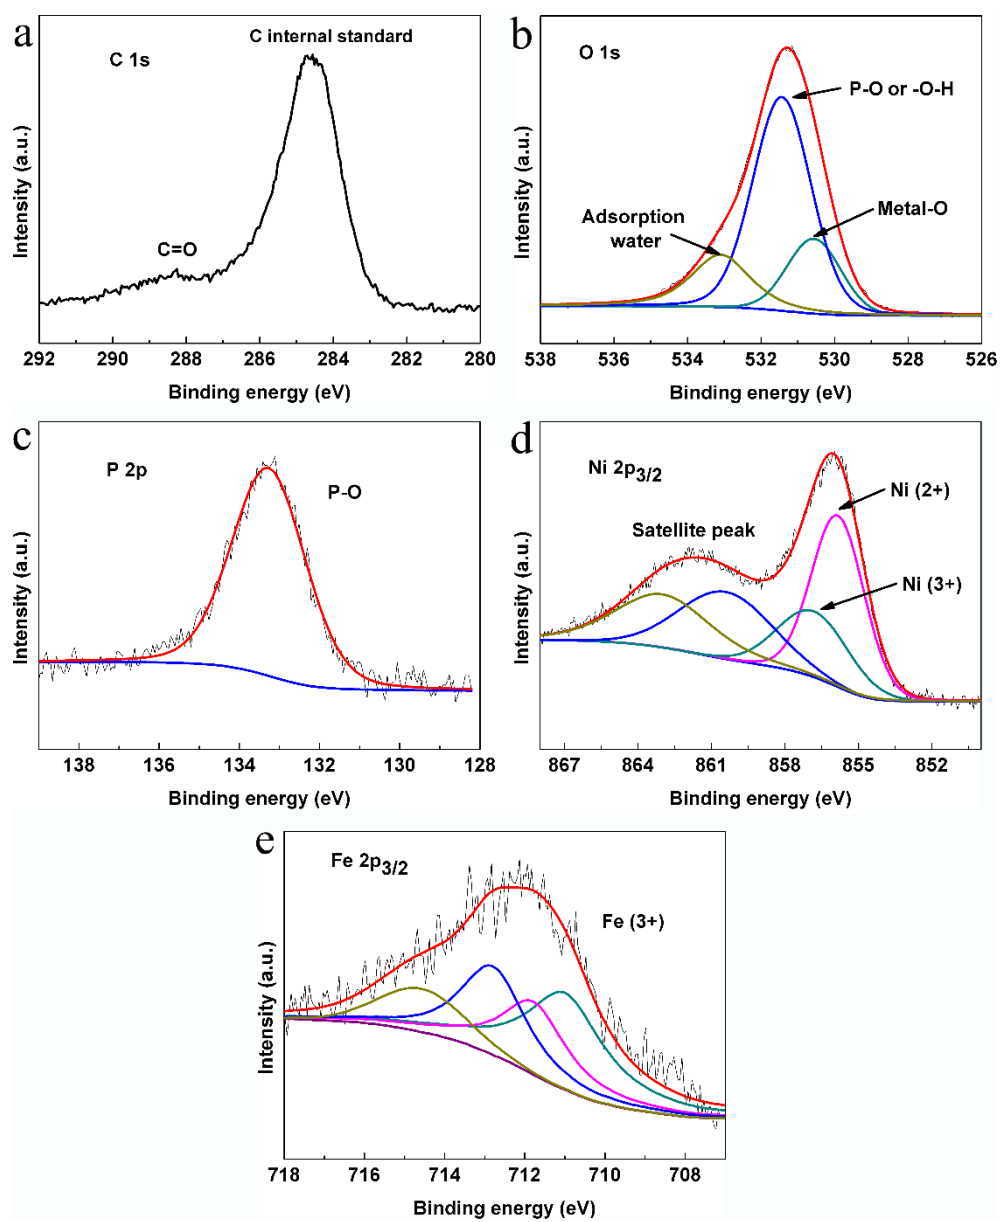

**Fig. S10** a) C 1s, b) O 1s, c) P 2p, d) Ni 2p<sub>3/2</sub> and e) Fe 2p<sub>3/2</sub> XPS spectra of the Ni-Fe-pho@NF.

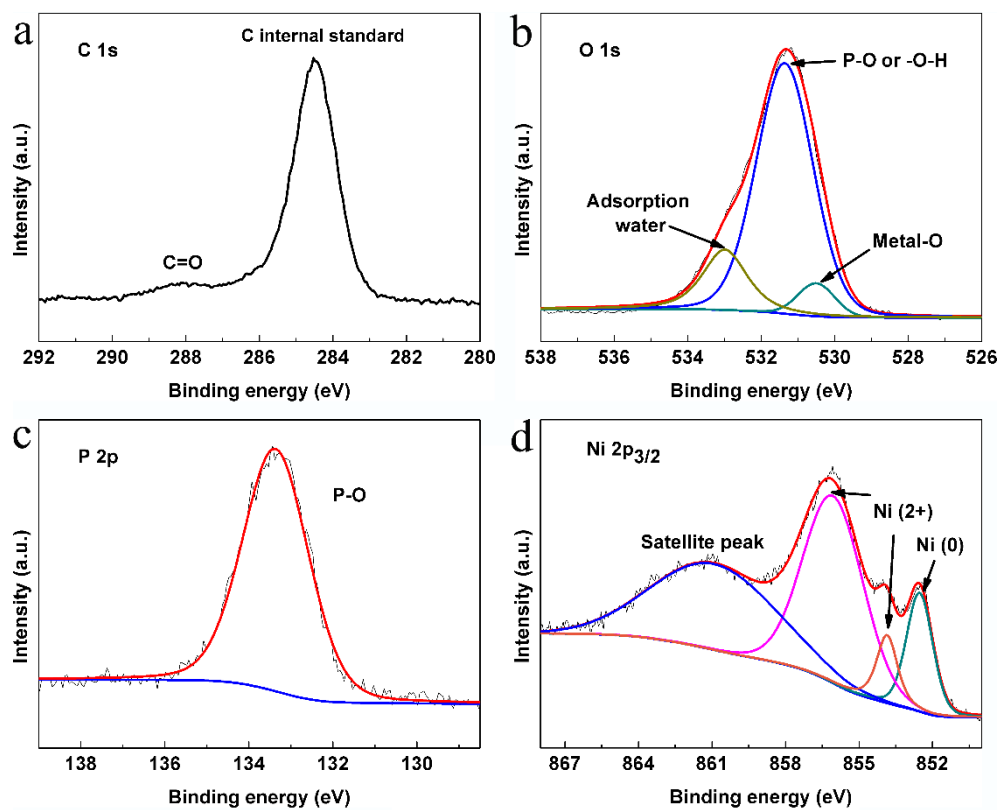

**Fig. S11** a) C 1s, b) O 1s, c) P 2p and d) Ni 2p<sub>3/2</sub> XPS spectra of the Ni-pho@NF.

**Table S3.** According to the XPS spectra, the Ni (3+) content in Ni-Fe-phy@NF, Ni-Fe-pho@NF, Ni-phy@NF and Ni-pho@NF.

| Chemical environment | Ni (%)  |         |
|----------------------|---------|---------|
|                      | Ni (2+) | Ni (3+) |
| Ni-Fe-phy@NF         | 62.2    | 37.8    |
| Ni-Fe-pho@NF         | 66.6    | 33.4    |
| Ni-phy@NF            | 65.5    | 34.5    |
| Ni-pho@NF            | 100     | 0       |

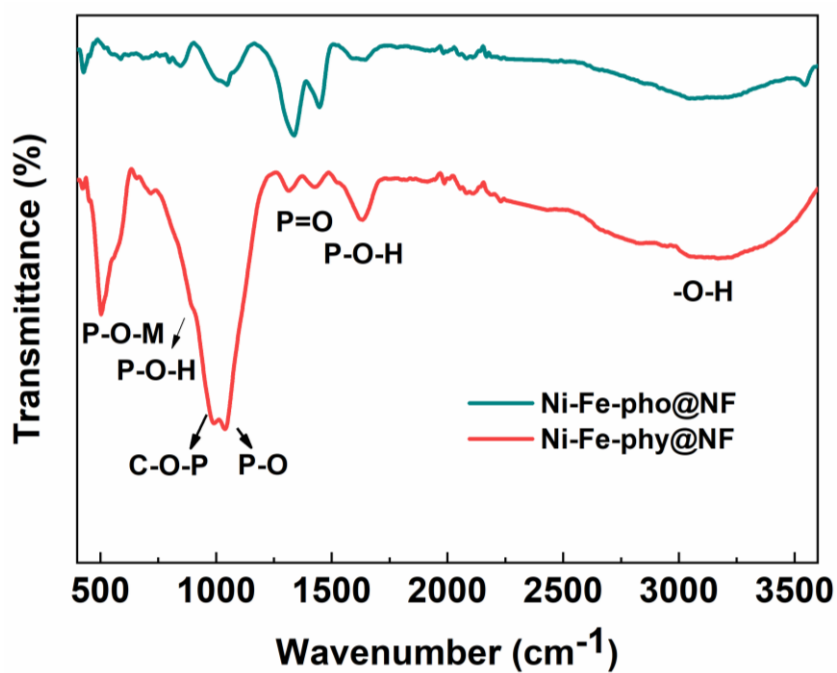

**Fig. S12** The ATR-IR of Ni-Fe-phy@NF and Ni-Fe-pho@NF.

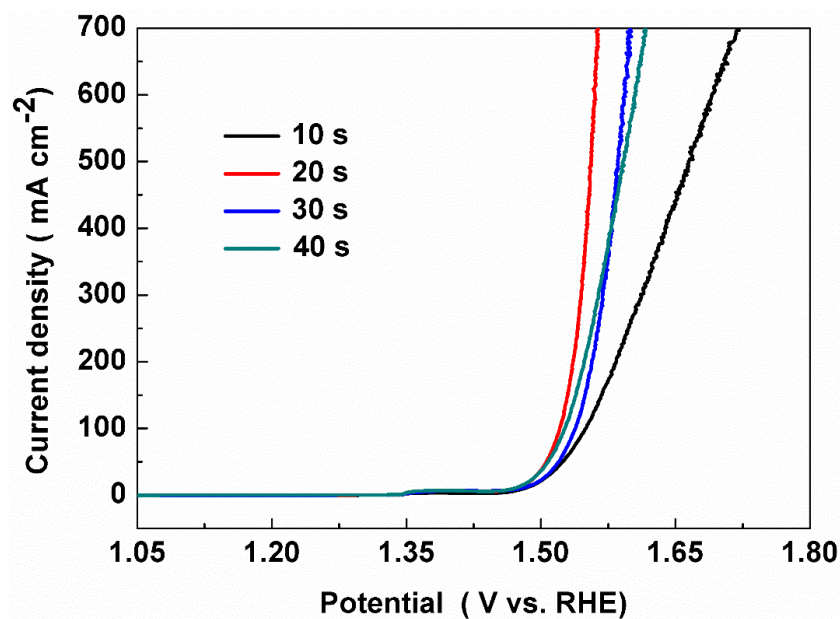

**Fig. S13** Polarization curves of the Ni-Fe-phy@NF electrodes based on different reaction time during preparation process.

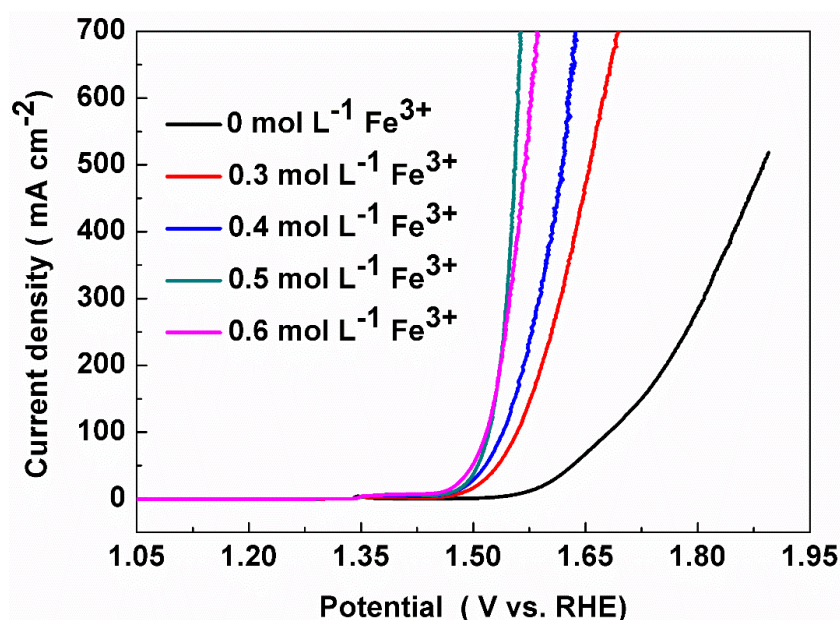

**Fig. S14** Polarization curves of the Ni-Fe-phy@NF electrodes based on different  $\text{Fe}^{3+}$  concentrations in the etching solutions during preparation process.

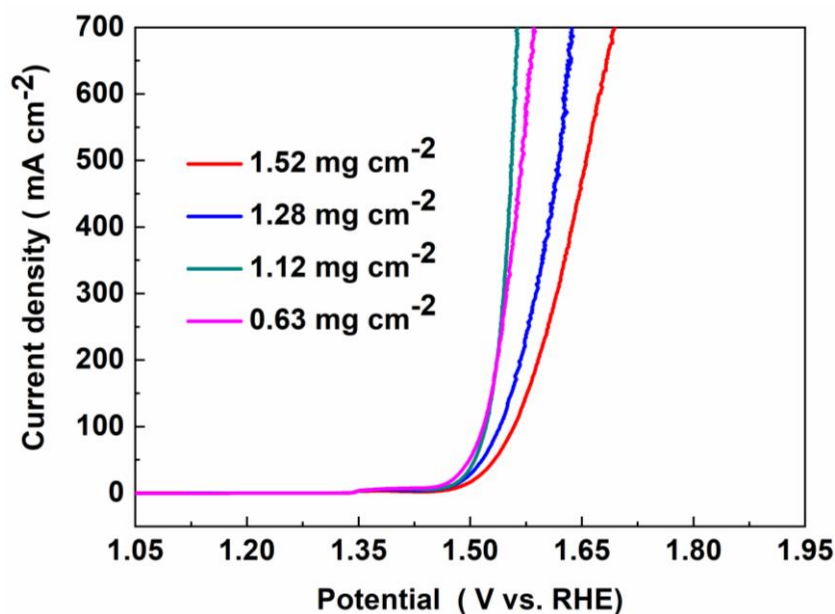

**Fig. S15** Polarization curves of the Ni-Fe-phy@NF electrodes with different loading mass via adjusting the Fe<sup>3+</sup> concentrations in the etching solutions during preparation process.

The Ni-Fe-phy@NF electrodes with different loading mass are obtained by adjusting the Fe concentration in the preparation solution (0.6, 0.5, 0.4 and 0.3 mol L<sup>-1</sup>), and the corresponding loading mass is 0.63, 1.12, 1.28 and 1.52 mg cm<sup>-2</sup>, respectively. The Ni-Fe-phy@NF shows the highest catalytic activity at the loading mass of 1.12 mg cm<sup>-2</sup>.

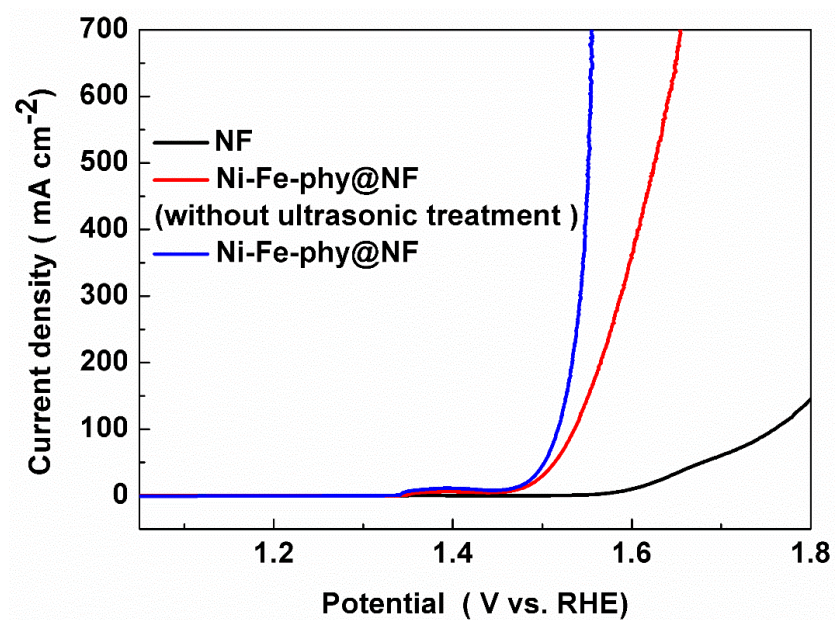

**Fig. S16** Polarization curves of the NF, Ni-Fe-phy@NF without ultrasonic treatment and Ni-Fe-phy@NF electrode.

**Table S4.** Comparison of OER catalytic activity in 1 M KOH.

| Catalysts                                               | Collector               | Tafel slope<br>(mV dec <sup>-1</sup> ) | Overpotential<br>(mV)<br>at different current<br>density (mA cm <sup>-2</sup> ) |      |      | Main preparation<br>processes                                            | Refere<br>nces |
|---------------------------------------------------------|-------------------------|----------------------------------------|---------------------------------------------------------------------------------|------|------|--------------------------------------------------------------------------|----------------|
|                                                         |                         |                                        | 10                                                                              | 100  | 200  |                                                                          |                |
|                                                         |                         |                                        |                                                                                 |      |      |                                                                          |                |
| Fe <sub>0.2</sub> Ni <sub>0.8</sub> /NC-600-a           | Glassy carbon electrode | 76                                     | ~270                                                                            | ~400 | -    | Water bath (30°C, 18 h)<br>Calcination (600°C, 3h)                       | [1]            |
| Ni <sub>4/5</sub> Fe <sub>1/5</sub> -LDHs-S-2           | Glassy carbon electrode | 61.5                                   | 257                                                                             | -    | -    | Hydrothermal Reaction (120°C, 12h)                                       | [2]            |
| Ni@Ru/CNS-10%                                           | Nickel foam             | 35                                     | 255                                                                             | 289  | ~310 | Hydrothermal Reaction (120°C, 24h)<br>Calcination (400°C, 2h)            | [3]            |
| Ni <sub>1.25</sub> Ru <sub>0.75</sub> P                 | Carbon cloth            | 50                                     | 260                                                                             | ~315 | ~330 | Electrodeposition (-)                                                    | [4]            |
| P-FeNiO/CNS                                             | Glassy carbon electrode | 52.2                                   | 220                                                                             | ~290 | -    | Calcination (300°C, 3h)                                                  | [5]            |
| NiFe-LDH-ZnO(2min)                                      | Nickel foam             | 57                                     | 210                                                                             | ~370 | -    | Hydrothermal Reaction (130°C, 12h)<br>Plasma magnetron sputtering (2min) | [6]            |
| Ni <sup>vac</sup> Fe <sup>vac</sup> -LDH                | Carbon paper            | 52                                     | 230                                                                             | ~350 | ~440 | Hydrothermal Reaction (150°C, 6h)<br>Etching process (160°C, 3h)         | [7]            |
| FeOOH <sub>xnm</sub> /Ni-Fe LDH                         | Glassy carbon electrode | 27                                     | 174                                                                             | -    | -    | Hydrothermal Reaction (120°C, 6h)                                        | [8]            |
| NiFe <sub>x</sub> /NiFe <sub>2</sub> O <sub>4</sub> @NC | Carbon paper            | 51.4                                   | 262                                                                             | ~310 | ~320 | Calcination (600°C, 2h, 350, 0.5h)                                       | [9]            |
| NiFe LDH-Ni <sub>(III)</sub> Li                         | NiFeMo alloy            | 35                                     | 248                                                                             | ~290 | -    | Oil bath (170°C 5h)                                                      | [10]           |
| Ni-Fe-phy@NF                                            | Nickel foam             | 48                                     | 233                                                                             | 287  | 303  | Ultrasonic treatment (20 s)                                              | This work      |

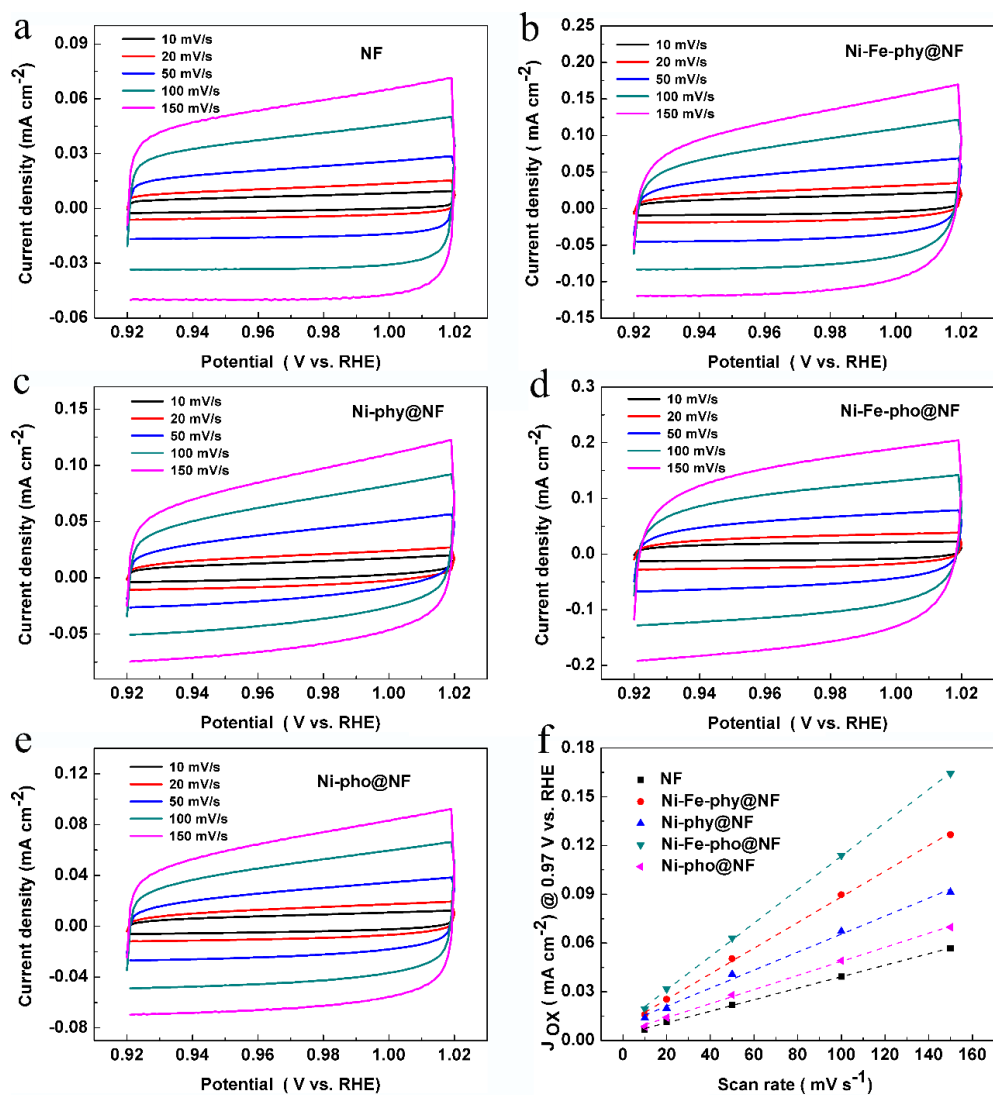

**Fig. S17** Double-layer capacitance measurements of these catalytic electrodes; a-e) the cyclic voltammograms of the catalysts at a series of scan rates of 10, 20, 50, 100 and 150 mV s<sup>-1</sup> from 0.92 to 1.02 V vs. RHE in 1 M KOH; f) the linear fitting of the oxidation currents of the catalysts at 0.97 V vs. RHE versus scan rates.

Electrical double-layer capacitance measurements were used to determine electrochemical active surface area of the catalysts. According to Fig. S17f, the electrical double-layer capacitance could be obtained. Then the electrochemical active surface area could be obtained based on the specific capacitance value of a smooth standard with a real surface area of 1 cm<sup>2</sup>. 40 μF cm<sup>-2</sup> is considered as the value of specific capacitance for a smooth standard with a real surface area of 1 cm<sup>2</sup> based on previous studies.<sup>[11]</sup>

The electrochemical active surface area could be obtained via the following equation:

$$A_{\text{ECSA}} = \frac{\text{The electrical double-layer capacitor}}{40}$$

For example:

$$\text{Ni-Fe-phy@NF: } A_{\text{ECSA}} = \frac{789.3}{40} = 19.7 \text{ cm}^2_{\text{ECSA}}$$

**Table S5.** Calculated electrochemical active surface area (ECSA) of the obtained electrodes.

| Catalysts                                         | NF    | Ni-Fe-<br>phy@NF | Ni-<br>phy@NF | Ni-Fe-<br>pho@NF | Ni-pho@NF |
|---------------------------------------------------|-------|------------------|---------------|------------------|-----------|
| Specific<br>Capacitance<br>(μF cm <sup>-2</sup> ) | 354.4 | 789.3            | 554.5         | 1030.0           | 433.7     |
| ECSA (cm <sup>2</sup> <sub>ECSA</sub> )           | 8.9   | 19.7             | 13.9          | 25.8             | 10.8      |

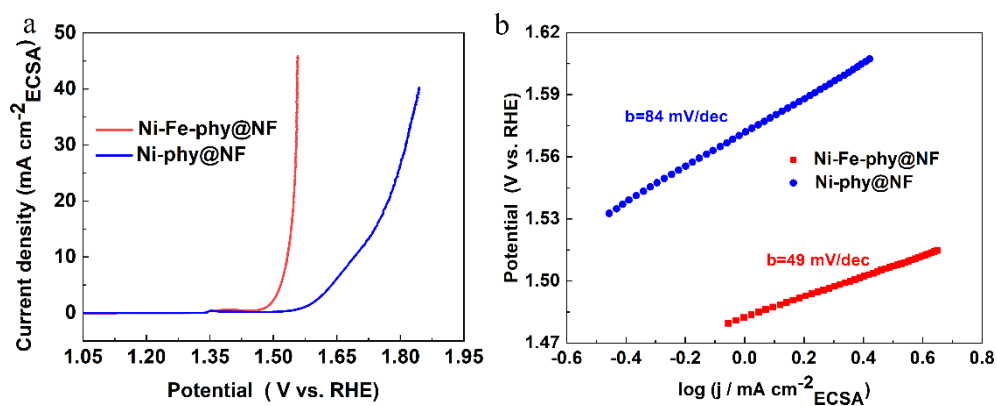

**Fig. S18** a) The polarization curves normalized to the electrochemically active surface area and b) the corresponding Tafel plots of Ni-Fe-phy@NF and Ni-phy@NF.

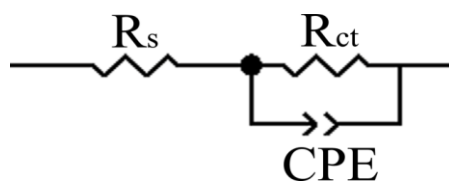

**Fig. S19** Equivalent circuit for the test of the electrochemical impedance spectroscopy.

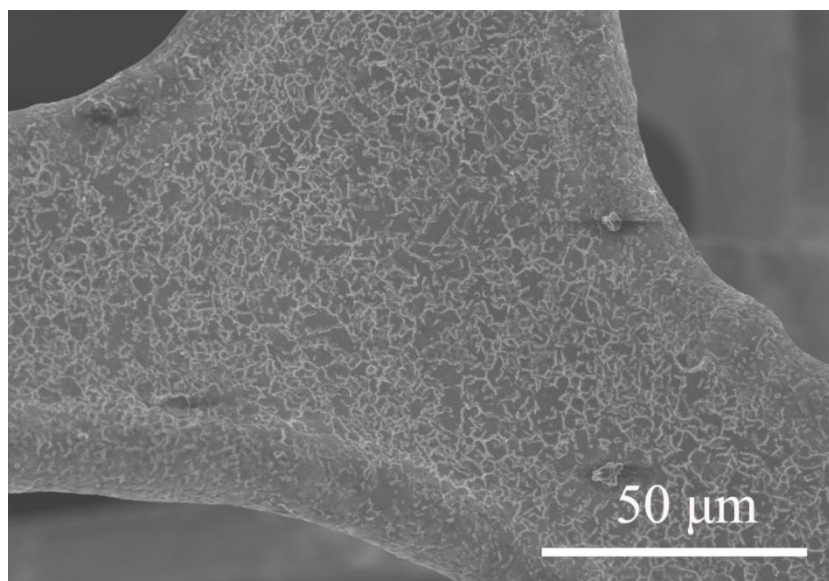

**Fig. S20** SEM image of Ni-Fe-phy@NF after OER process.

**Table S6.** Content of P and Fe in Ni-Fe-phy@NF after OER process and Ni-Fe-pho@NF after OER process according to the ICP-OMS test

| Catalytic electrode | Ni-Fe-phy@NF after OER<br>process | Ni-Fe-pho@NF after OER<br>process |
|---------------------|-----------------------------------|-----------------------------------|
| Fe(wt%)             | 0.15                              | 0.11                              |
| P(wt%)              | 0.21                              | 0.00                              |

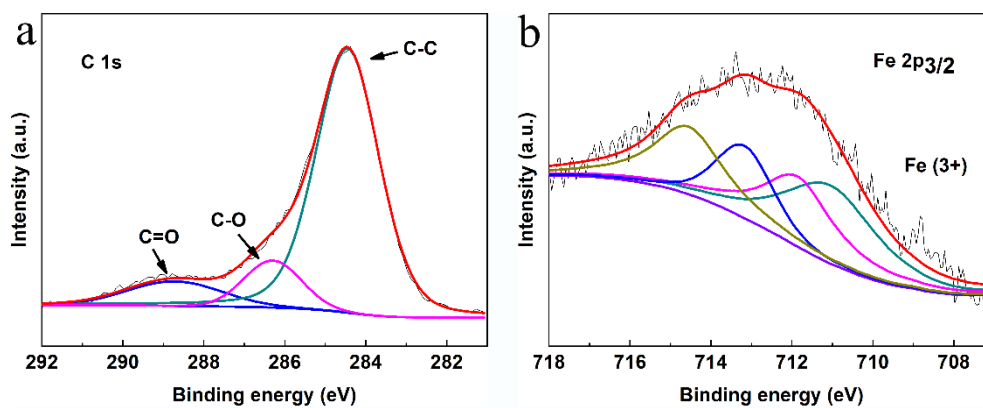

**Fig. S21** a) C 1s and b) Fe 2p<sub>3/2</sub> XPS spectrum of the Ni-Fe-phy@NF after OER process.

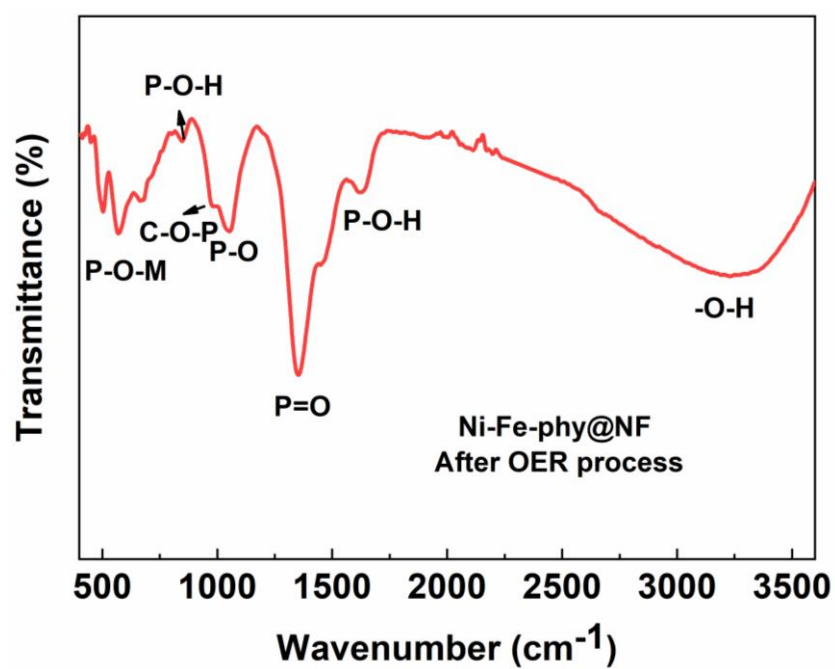

**Fig. S22** The ATR-IR spectrum of Ni-Fe-phy@Ni after OER process

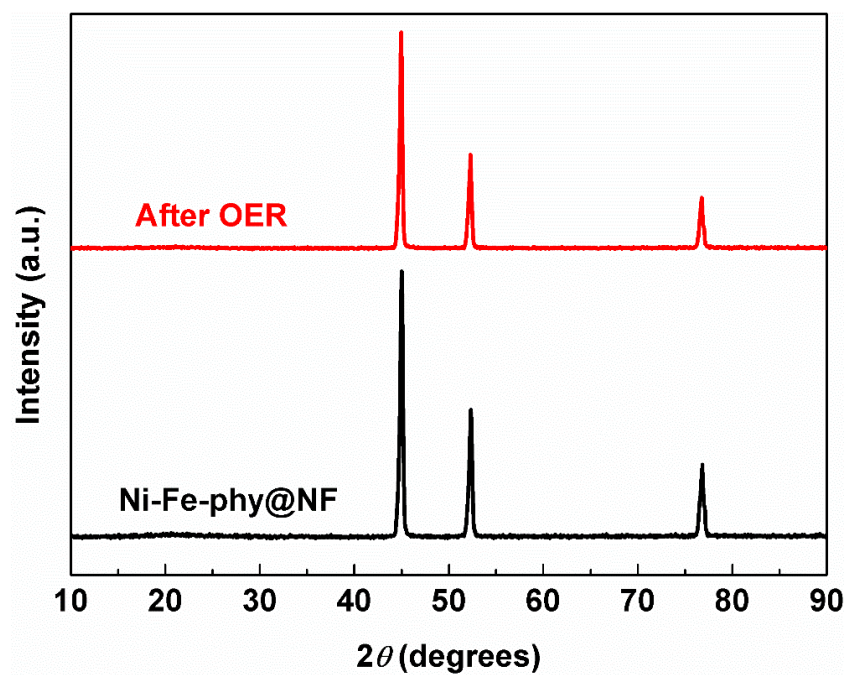

**Fig. S23** XRD patterns of the Ni-Fe-phy@NF electrode before and after OER process.

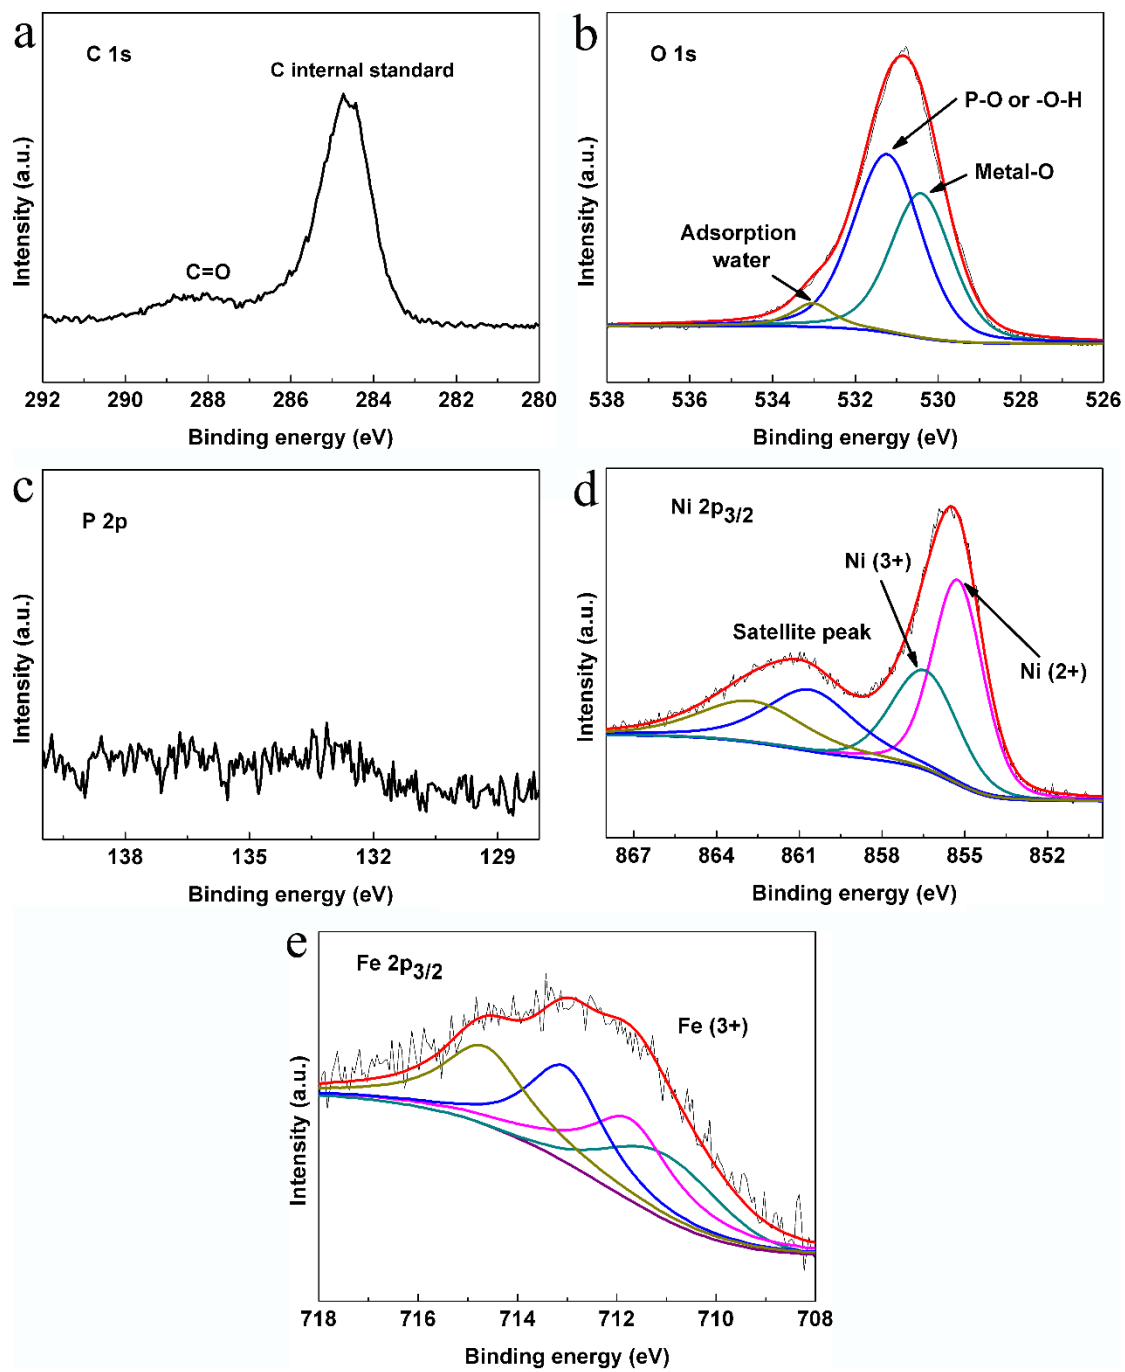

**Fig. S24** a) C 1s, b) O 1s, c) P 2p, d) Ni 2p<sub>3/2</sub> and e) Fe 2p<sub>3/2</sub> XPS spectra of the Ni-Fe-pho@NF after OER process.

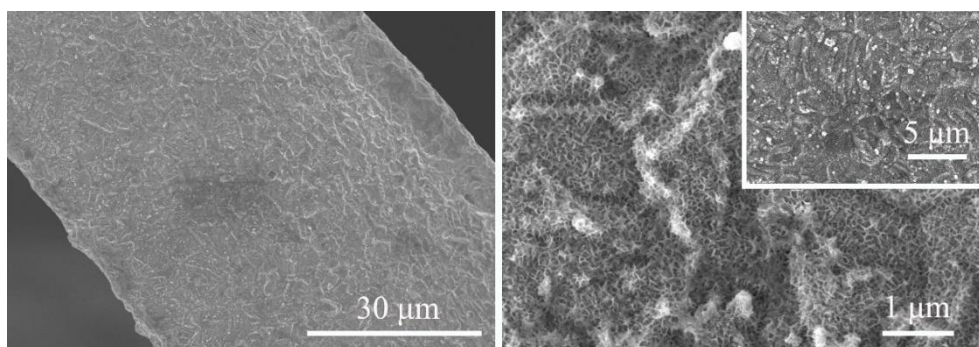

**Fig. S25** SEM image of Ni-Fe-pho@NF after OER process.

**Table S7.** According to the XPS spectra, the Ni (3+) content in Ni-Fe-phy@NF and Ni-Fe-pho@NF after OER process.

| Chemical environment           | Ni (%)  |         |
|--------------------------------|---------|---------|
|                                | Ni (2+) | Ni (3+) |
| Ni-Fe-phy@NF after OER process | 57.3    | 42.7    |
| Ni-Fe-pho@NF after OER process | 61.9    | 38.1    |

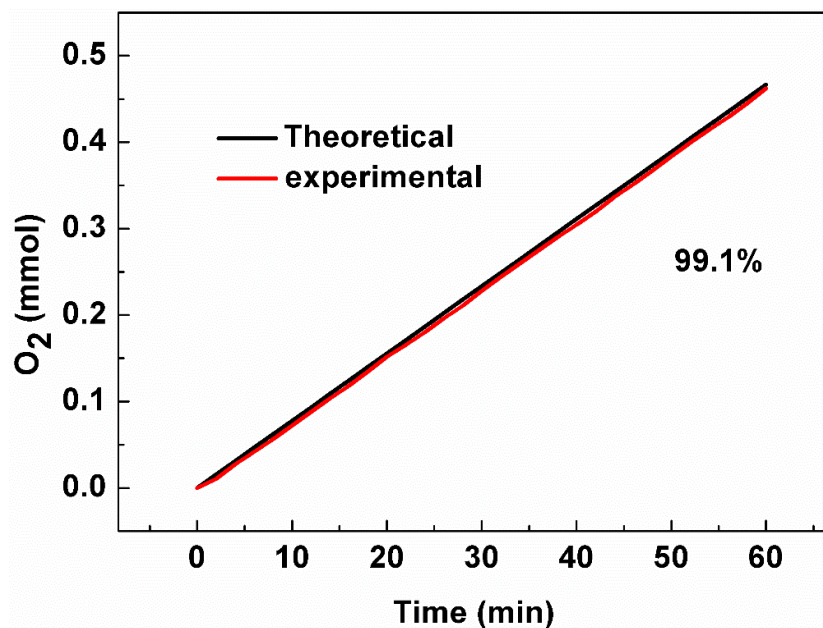

**Fig. S26** Faraday efficiency of the Ni-Fe-phy@NF at the current density of 50 mA cm<sup>-2</sup>.

## References

- [1] Y. Zhou, Y. Li, L. Zhang, L. Zhang, L. Li, J. Tian, M. Wang, J. Xu, B. Dai, Y. Li, Fe-leaching induced surface reconstruction of Ni-Fe alloy on N-doped carbon to boost oxygen evolution reaction, *Chemical Engineering Journal*, 394 (2020) 124977.
- [2] S. Li, J. Liu, S. Duan, T. Wang, Q. Li, Tuning the oxygen evolution electrocatalysis on NiFe-layered double hydroxides via sulfur doping, *Chinese Journal of Catalysis*, 41 (2020) 847-852.
- [3] Y. Li, G. Zhang, W. Lu, F. Cao, Amorphous Ni-Fe-Mo Suboxides Coupled with Ni Network as Porous Nanoplate Array on Nickel Foam: A Highly Efficient and Durable Bifunctional Electrode for Overall Water Splitting, *Advanced Science*, 7 (2020) 1902034.
- [4] M. Chen, S. Lu, X. Fu, J. Luo, Core-Shell Structured NiFeSn@NiFe (Oxy)Hydroxide Nanospheres from an Electrochemical Strategy for Electrocatalytic Oxygen Evolution Reaction, *Advanced Science*, 7 (2020) 1903777.
- [5] Z. Liu, B. Tang, X. Gu, H. Liu, L. Feng, Selective structure transformation for NiFe/NiFe<sub>2</sub>O<sub>4</sub> embedded porous nitrogen-doped carbon nanosphere with improved oxygen evolution reaction activity, *Chemical Engineering Journal*, 395 (2020) 125170.
- [6] Y. Luo, Y. Wu, D. Wu, C. Huang, D. Xiao, H. Chen, S. Zheng, P.K. Chu, NiFe-Layered Double Hydroxide Synchronously Activated by Heterojunctions and Vacancies for the Oxygen Evolution Reaction, *ACS Applied Materials & Interfaces*, 12 (2020) 42850-42858.
- [7] L. Peng, N. Yang, Y. Yang, Q. Wang, X. Xie, D. Sun-Waterhouse, L. Shang, T. Zhang, G.I.N. Waterhouse, Atomic Cation-Vacancy Engineering of NiFe-Layered Double Hydroxides for Improved Activity and Stability towards the Oxygen Evolution Reaction, *Angewandte Chemie International*

Edition, 60 (2021) 24612-24619.

- [8] J. Chen, F. Zheng, S. Zhang, A. Fisher, Y. Zhou, Z. Wang, Y. Li, B. Xu, J. Li, S. Sun, Interfacial Interaction between FeOOH and Ni-Fe LDH to Modulate the Local Electronic Structure for Enhanced OER Electrocatalysis, *ACS Catalysis*, 8 (2018) 11342-11351.
- [9] J. Zhao, X. Zhang, M. Liu, Y. Jiang, M. Wang, Z. Li, Z. Zhou, Metal-organic-framework-derived porous 3D heterogeneous NiFe<sub>x</sub>/NiFe<sub>2</sub>O<sub>4</sub>@NC nanoflowers as highly stable and efficient electrocatalysts for the oxygen-evolution reaction, *Journal of Materials Chemistry A*, 7 (2019) 21338-21348.
- [10] Z. Xu, Y. Ying, G. Zhang, K. Li, Y. Liu, N. Fu, X. Guo, F. Yu, H. Huang, Engineering NiFe layered double hydroxide by valence control and intermediate stabilization toward the oxygen evolution reaction, *Journal of Materials Chemistry A*, 8 (2020) 26130-26138.
- [11] Y. Liu, N. Ran, R. Ge, J. Liu, W. Li, Y. Chen, L. Feng, R. Che, Porous Mn-doped cobalt phosphide nanosheets as highly active electrocatalysts for oxygen evolution reaction, *Chemical Engineering Journal*, 425 (2021) 131642.
